# Supplementary material for: Identification of a Novel Brevibacillus laterosporus Strain With Insecticidal Activity Against Aedes albopictus Larvae
Source: Front Microbiol. 2021 Feb 17;12:624014. doi: 10.3389/fmicb.2021.624014 (PMC7925996; doi:10.3389/fmicb.2021.624014)
Supplement: Supplementary file 5 [file Data_Sheet_1.XLSX]

## Sheet: Prova
Supplementary datasheet 1. List of COGs unique to SAM19. For each COG, the corresponding gene, the BLAST hit result and the final annotation are reported.
gene	blast hit	final annotation	COG	description	COG category
LICBGMMG_00049_hypothetical_protein	hypothetical protein [Brevibacillus laterosporus] WP_119734455.1	hypothetical protein	COG1621	Sucrose-6-phosphate hydrolase SacC, GH32 family	G
LICBGMMG_00204_hypothetical_protein	hypothetical protein [Brevibacillus laterosporus] WP_104030888.1	hypothetical protein	COG2825	Periplasmic chaperone for outer membrane proteins, Skp family	MO
LICBGMMG_00206_hypothetical_protein	hypothetical protein C4A77_04405 [Brevibacillus laterosporus] PPB10944.1	hypothetical protein	COG4479	Uncharacterized protein YozE, UPF0346 family	S
LICBGMMG_00218_DNA_polymerase_I_thermostable	DNA polymerase [Brevibacillus laterosporus] WP_101669423.1	Family A DNA polymerase	COG0749	DNA polymerase I - 3'-5' exonuclease and polymerase domains	L
LICBGMMG_00228_hypothetical_protein	virulence protein E [Brevibacillus laterosporus] WP_104030913.1	Virulence protein E-like P-loop ATPase domain protein	COG5545	Predicted P-loop ATPase and inactivated derivatives	X
LICBGMMG_00235_hypothetical_protein	hypothetical protein [Brevibacillus laterosporus] WP_101667760.1	Putative phage terminase-like protein	COG4373	Mu-like prophage FluMu protein gp28	X
LICBGMMG_00241_hypothetical_protein	hypothetical protein [Brevibacillus laterosporus] WP_104030924.1	hypothetical protein	COG5005	Mu-like prophage protein gpG	X
LICBGMMG_00244_hypothetical_protein	tail protein [Brevibacillus phage Emery] AGR47355.2	hypothetical protein	COG3497	Phage tail sheath protein FI	X
LICBGMMG_00247_hypothetical_protein	phage tail tape measure protein [Brevibacillus laterosporus] WP_104030930.1	Phage-related tail protein	COG5412	Phage-related protein	X
LICBGMMG_00249_hypothetical_protein	hypothetical protein [Brevibacillus laterosporus] WP_104030932.1	Phage late control gene D protein	COG3500	Phage protein D	X
LICBGMMG_00263_hypothetical_protein	hypothetical protein [Brevibacillus laterosporus] WP_119732346.1	hypothetical protein	COG4269	Uncharacterized membrane protein YjgN, DUF898 family	S
LICBGMMG_00292_Regulatory_protein_RepA	AAA family ATPase [Brevibacillus laterosporus] WP_119734532.1	Primase and RecA-like domain-containing protein	COG3598	RecA-family ATPase	L
LICBGMMG_00315_hypothetical_protein	hypothetical protein [Brevibacillus laterosporus] WP_119732324.1	hypothetical protein	COG5005	Mu-like prophage protein gpG	X
LICBGMMG_00322_hypothetical_protein	phage tail tape measure protein [Brevibacillus laterosporus] WP_119732330.1	Phage-related minor tail protein	COG5280	Phage-related minor tail protein	X
LICBGMMG_00325_hypothetical_protein	hypothetical protein [Brevibacillus laterosporus] WP_119732333.1	hypothetical protein	COG0625	Glutathione S-transferase	O
LICBGMMG_00327_hypothetical_protein	hypothetical protein [Brevibacillus laterosporus] WP_119732335.1	Phage protein	COG4540	Phage P2 baseplate assembly protein gpV	X
LICBGMMG_00684_Primary_amine_oxidase	hypothetical protein BrL25_03710 [Brevibacillus laterosporus DSM 25] ATO48288.1	Copper amine oxidase N-terminal domain-containing protein	COG2373	Uncharacterized conserved protein YfaS, alpha-2-macroglobulin family	R
LICBGMMG_00724_hypothetical_protein	hypothetical protein [Brevibacillus laterosporus] WP_104148997.1	hypothetical protein	COG4152	ABC-type uncharacterized transport system, ATPase component	R
LICBGMMG_01098_hypothetical_protein	transposase [Bacillus pseudomycoides] WP_098161068.1	hypothetical protein	COG3669	Alpha-L-fucosidase	G
LICBGMMG_01132_hypothetical_protein	stage V sporulation protein AE [Brevibacillus laterosporus] WP_104033655.1	SpoVA/SpoVAEb family sporulation membrane protein	COG0684	Regulator of RNase E activity RraA	J
LICBGMMG_01749_hypothetical_protein	hypothetical protein [Brevibacillus laterosporus] WP_119734048.1	hypothetical protein	COG1340	Uncharacterized coiled-coil protein, contains DUF342 domain	S
LICBGMMG_01753_hypothetical_protein	hypothetical protein [Brevibacillus laterosporus] WP_119734051.1	hypothetical protein	COG0645	Predicted kinase	R
LICBGMMG_01765_Modification_methylase_DpnIIA	DNA adenine methylase [Brevibacillus laterosporus] WP_119734060.1	DNA adenine methylase	COG0338	Site-specific DNA-adenine methylase	L
LICBGMMG_01976_Stage_VI_sporulation_protein_D	hypothetical protein C4A77_10490 [Brevibacillus laterosporus] PPB03182.1	hypothetical protein	COG4372	Uncharacterized conserved protein, contains DUF3084 domain	S
LICBGMMG_01986_Endonuclease_V	deoxyribonuclease V [Brevibacillus laterosporus] WP_119733706.1	Endonuclease V	COG1515	Deoxyinosine 3'endonuclease (endonuclease V)	L
LICBGMMG_02480_hypothetical_protein	hypothetical protein [Brevibacillus laterosporus] WP_003339709.1	hypothetical protein	COG4719	Uncharacterized protein	S
LICBGMMG_02488_hypothetical_protein	hypothetical protein [Brevibacillus laterosporus] WP_104150062.1	hypothetical protein	COG0859	ADP-heptose:LPS heptosyltransferase	M
LICBGMMG_02720_hypothetical_protein	hypothetical protein [Brevibacillus laterosporus] AYB39145.1	hypothetical protein	COG3434	c-di-GMP-related signal transduction protein, contains EAL and HDOD domains	T
LICBGMMG_02735_hypothetical_protein	hypothetical protein BrL25_16980 [Brevibacillus laterosporus DSM 25] ATO50640.1	hypothetical protein	COG5550	Predicted aspartyl protease	O
LICBGMMG_02963_hypothetical_protein	DUF2334 domain-containing protein [Brevibacillus laterosporus] WP_162932845.1	hypothetical protein	COG5298	Uncharacterized protein YdaL	S
LICBGMMG_03065_D-alanyl-D-alanine_dipeptidase	D-Ala-D-Ala dipeptidase VanX [Brevibacillus laterosporus] WP_119733130.1	D-alanyl-D-alanine dipeptidase	COG2173	D-alanyl-D-alanine dipeptidase	M
LICBGMMG_03071_hypothetical_protein	helix-turn-helix domain-containing protein [Brevibacillus laterosporus] WP_119733135.1	Helix-turn-helix domain-containing protein	COG3177	Fic family protein	K
LICBGMMG_03109_CRISPR-associated_endoribonuclease_Cas2	CRISPR associated Cas2 family protein [Brevibacillus laterosporus GI-9] CCF15450.1	CRISPR/Cas system-associated endonuclease Cas2	COG3512	CRISPR/Cas system-associated protein Cas2, endoribonuclease	V
LICBGMMG_03110_CRISPR-associated_endonuclease_Cas1	type II CRISPR-associated endonuclease Cas1 [Brevibacillus laterosporus] WP_003343630.1	CRISPR/Cas system-associated endonuclease Cas1	COG1518	CRISPR/Cas system-associated endonuclease Cas1	V
LICBGMMG_03111_CRISPR-associated_endonuclease_Cas9	type II CRISPR RNA-guided endonuclease Cas9 [Brevibacillus laterosporus] WP_003343632.1	CRISPR/Cas system-associated endonuclease Cas	COG3513	CRISPR/Cas system Type II associated protein, contains McrA/HNH and RuvC-like nuclease domains	V
LICBGMMG_03121_Putative_cyclic-di-GMP_phosphodiesterase_AdrB	EAL domain-containing protein [Aneurinibacillus aneurinilyticus] WP_040304445.1	EAL C-terminal domain-containing protein	COG2200	EAL domain, c-di-GMP-specific phosphodiesterase class I (or its enzymatically inactive variant)	T
LICBGMMG_03122_hypothetical_protein	-	EAL N-terminal domain-containing protein	COG2200	EAL domain, c-di-GMP-specific phosphodiesterase class I (or its enzymatically inactive variant)	T
LICBGMMG_03134_hypothetical_protein	-	Flavodoxin family protein	COG4635	Protoporphyrinogen IX oxidase, menaquinone-dependent (flavodoxin domain)	H
LICBGMMG_03390_hypothetical_protein	hypothetical protein [Brevibacillus laterosporus] WP_119732614.1	hypothetical protein	COG1592	Rubrerythrin	C
LICBGMMG_03730_tRNA(Glu)-specific_nuclease_WapA	tRNA(Glu)-specific nuclease WapA precursor [Brevibacillus laterosporus LMG 15441] AIG26582.1	Putative RHS-associated insecticidal toxin domain protein	COG1372	Intein/homing endonuclease	LX
LICBGMMG_03739_hypothetical_protein	hypothetical protein [Brevibacillus laterosporus] WP_119733219.1	hypothetical protein	COG1112	Superfamily I DNA and/or RNA helicase	L
LICBGMMG_03890_hypothetical_protein	hypothetical protein [Brevibacillus laterosporus] WP_146067790.1	hypothetical protein	COG2911	Autotransporter translocation and assembly factor TamB	U
LICBGMMG_03950_Deoxycytidine_triphosphate_deaminase	dCTP deaminase [Brevibacillus sp. VP] WP_116334213.1	Deoxycytidine triphosphate deaminase N-terminal domain protein	COG0717	Deoxycytidine triphosphate deaminase	F
LICBGMMG_03986_hypothetical_protein	suppressor of fused domain protein [Brevibacillus laterosporus] WP_119733999.1	Suppressor of fused domain protein	COG4859	Uncharacterized protein	S
LICBGMMG_04117_hypothetical_protein	hypothetical protein [Brevibacillus laterosporus] WP_119734137.1	hypothetical protein	COG0810	Periplasmic protein TonB, links inner and outer membranes	M
LICBGMMG_04141_hypothetical_protein	hypothetical protein [Brevibacillus laterosporus] WP_119733372.1	hypothetical protein	COG2730	Aryl-phospho-beta-D-glucosidase BglC, GH1 family	G
LICBGMMG_04165_hypothetical_protein	siphovirus Gp157 family protein [Brevibacillus laterosporus] WP_119733392.1	Siphovirus Gp157 family protein	COG1049	Aconitase B	C
LICBGMMG_04363_hypothetical_protein	hypothetical protein D5F52_04055 [Brevibacillus laterosporus] AYB37515.1	Putative phage-related protein	COG4926	Phage-related protein	X
LICBGMMG_04364_hypothetical_protein	hypothetical protein [Brevibacillus laterosporus] WP_119732668.1	Putative phage-related protein	COG4722	Phage-related protein	X
LICBGMMG_04374_hypothetical_protein	hypothetical protein [Brevibacillus laterosporus] WP_119732677.1	hypothetical protein	COG3145	Alkylated DNA repair dioxygenase AlkB	L
LICBGMMG_04383_hypothetical_protein	hypothetical protein [Brevibacillus laterosporus] WP_119732686.1	hypothetical protein	COG4991	Uncharacterized conserved protein YraI	S
LICBGMMG_04385_hypothetical_protein	terminase [Brevibacillus laterosporus] WP_119732688.1	Phage terminase domain protein	COG4373	Mu-like prophage FluMu protein gp28	X
LICBGMMG_04387_hypothetical_protein	metallophosphoesterase [Brevibacillus laterosporus] WP_119732690.1	hypothetical protein	COG0435	Glutathionyl-hydroquinone reductase	C
LICBGMMG_04392_Competence_protein_CoiA	hypothetical protein [Brevibacillus laterosporus] WP_119732695.1	Competence protein CoiA-like family domain protein	COG4469	Competence protein CoiA-like family, contains a predicted nuclease domain	R
LICBGMMG_04497_N-acetylmuramoyl-L-alanine_amidase_A	N-acetylmuramoyl-L-alanine amidase [Brevibacillus laterosporus] WP_104031030.1	Amidase domain protein	COG3023	N-acetyl-anhydromuramyl-L-alanine amidase AmpD	M
LICBGMMG_04498_hypothetical_protein	N-acetylmuramoyl-L-alanine amidase [Brevibacillus laterosporus] WP_104031030.1	Amidase domain protein	COG3023	N-acetyl-anhydromuramyl-L-alanine amidase AmpD	M
LICBGMMG_04602_Nisin_biosynthesis_protein_NisC	lanthionine synthetase C family protein [Brevibacillus laterosporus] WP_119733791.1	Lanthionine synthetase C family protein	COG4403	Lantibiotic modifying enzyme	V
LICBGMMG_04734_hypothetical_protein	MULTISPECIES: SocA family protein [Brevibacillus] WP_119734014.1	SocA family protein	COG3600	Uncharacterized phage-associated protein	X
LICBGMMG_04752_hypothetical_protein	hypothetical protein D5F52_04210 [Brevibacillus laterosporus] AYB37546.1	hypothetical protein	COG2452	Predicted site-specific integrase-resolvase	X
LICBGMMG_04779_hypothetical_protein	TIR domain-containing protein [Brevibacillus laterosporus] WP_119732714.1	TIR domain-containing protein	COG1262	Formylglycine-generating enzyme, required for sulfatase activity, contains SUMF1/FGE domain	O
LICBGMMG_04814_hypothetical_protein	ASCH domain-containing protein [Brevibacillus laterosporus] WP_018671955.1	ASCH domain-containing protein	COG4933	Predicted transcriptional regulator, contains an HTH and PUA-like domains	K
LICBGMMG_04820_hypothetical_protein	hypothetical protein [Brevibacillus laterosporus] WP_119733204.1	hypothetical protein	COG3485	Protocatechuate 3,4-dioxygenase beta subunit	Q
LICBGMMG_04886_hypothetical_protein	ORF6C domain-containing protein [Brevibacillus laterosporus] WP_119733355.1	ORF6C domain-containing protein	COG3617	Prophage antirepressor	X
LICBGMMG_04890_hypothetical_protein	antA/AntB antirepressor family protein [Brevibacillus laterosporus] WP_119733351.1	AntA/AntB antirepressor family protein	COG3561	Phage anti-repressor protein	X
LICBGMMG_04892_hypothetical_protein	hypothetical protein [Brevibacillus laterosporus] WP_022583709.1	Phage tail assembly chaperone	COG0348	Polyferredoxin	C
LICBGMMG_04923_hypothetical_protein	hypothetical protein [Brevibacillus laterosporus] WP_018671207.1	hypothetical protein	COG1958	Small nuclear ribonucleoprotein (snRNP) homolog	K
LICBGMMG_04948_hypothetical_protein	hypothetical protein [Brevibacillus laterosporus] WP_119732655.1	hypothetical protein	COG3220	Uncharacterized conserved protein, UPF0276 family	S
LICBGMMG_04963_Multicopper_oxidase_MmcO	multicopper oxidase family protein [Brevibacillus laterosporus] WP_119733101.1	Multicopper oxidase family protein	COG2132	Multicopper oxidase with three cupredoxin domains (includes cell division protein FtsP and spore coat protein CotA)	DPM
LICBGMMG_04995_hypothetical_protein	hypothetical protein [Brevibacillus laterosporus] WP_119732810.1	hypothetical protein	COG0362	6-phosphogluconate dehydrogenase	G
LICBGMMG_04999_hypothetical_protein	nuclease [Brevibacillus laterosporus] WP_119734713.1	Nuclease	COG1372	Intein/homing endonuclease	LX
LICBGMMG_05161_hypothetical_protein	hypothetical protein [Brevibacillus laterosporus] WP_119732722.1	hypothetical protein	COG2972	Sensor histidine kinase YesM	T
LICBGMMG_05168_hypothetical_protein	hypothetical protein [Brevibacillus laterosporus] WP_119732729.1	hypothetical protein	COG2353	Polyisoprenoid-binding periplasmic protein YceI	R
LICBGMMG_05181_hypothetical_protein	hypothetical protein [Brevibacillus laterosporus] WP_119732741.1	hypothetical protein	COG4972	Tfp pilus assembly protein, ATPase PilM	NW
LICBGMMG_05226_hypothetical_protein	IS1182 family transposase [Paenibacillus sp. IHBB 10380] WP_144407019.1	Transposase domain protein	COG3666	Transposase	X
LICBGMMG_05228_hypothetical_protein	IS1182 family transposase [Paenibacillus sp. IHBB 10380] WP_144407019.1	Transposase domain protein	COG3666	Transposase	X
LICBGMMG_05233_hypothetical_protein	flagellar protein FliT [Brevibacillus laterosporus] WP_119734423.1	hypothetical protein	COG1629	Outer membrane receptor proteins, mostly Fe transport	P
LICBGMMG_05250_hypothetical_protein	DUF1878 family protein [Brevibacillus laterosporus] WP_119733118.1	hypothetical protein	COG3523	Type VI protein secretion system component VasK	U
LICBGMMG_05281_hypothetical_protein	hypothetical protein [Brevibacillus laterosporus] WP_119733126.1	hypothetical protein	COG1736	Diphthamide synthase subunit DPH2	J
LICBGMMG_05295_hypothetical_protein	SOS response-associated peptidase family protein [Brevibacillus laterosporus] WP_140576514.1	SOS response-associated peptidase family C-terminal domain protein	COG2135	Putative SOS response-associated peptidase YedK	O
LICBGMMG_05327_DNA_gyrase_inhibitor	GyrI-like domain-containing protein [Brevibacillus laterosporus] WP_119733136.1	GyrI-like domain-containing protein	COG3449	DNA gyrase inhibitor GyrI	L
LICBGMMG_05350_hypothetical_protein	-	hypothetical protein	COG4549	Uncharacterized protein YcnI	S
